# Supplementary material for: Validation of Clinical Treatment Score post-5 years (CTS5) risk stratification in premenopausal breast cancer patients and Ki-67 labelling index
Source: PubMed Central journal article supplement (PMC7546620; doi:10.1038/s41598-020-74055-3), 2020-10-08
Supplement: 41598_2020_74055_MOESM3_ESM.pdf [file 41598_2020_74055_MOESM3_ESM.pdf]

**Validation of Clinical Treatment Score post-5 years (CTS5)  
risk stratification in premenopausal breast cancer patients  
and Ki-67 labelling index**

Janghee Lee<sup>1,3†</sup>, Chihwan Cha<sup>4†</sup>, Sung Gwe Ahn<sup>1\*</sup>, Dooreh Kim<sup>1</sup>, Soeun Park<sup>1</sup>,  
Soong June Bae<sup>1</sup>, Jeeye Kim<sup>2</sup>, Hyung Seok Park<sup>2</sup>, Seho Park<sup>2</sup>, Seung Il Kim<sup>2</sup>,  
Byeong-Woo. Park<sup>2</sup> and Joon Jeong<sup>1\*</sup>

<sup>1</sup>Department of Surgery, Gangnam Severance Hospital, Yonsei University  
College of Medicine, Seoul, Republic of Korea

<sup>2</sup>Department of Surgery, Severance Hospital, Yonsei University College of  
Medicine, Seoul, Republic of Korea

<sup>3</sup>Department of Surgery, Sacred Heart Hospital, Hallym University, Dongtan,  
Republic of Korea

<sup>4</sup>Department of Surgery, Hanyang University College of Medicine, Seoul,  
Republic of Korea

<sup>†</sup>These authors contributed equally to this work.

**\*Co-Correspondence to:** Joon Jeong, MD, PhD

Department of Surgery, Gangnam Severance Hospital, 712 Eonjuro, Gangnam-gu, Seoul, 06273, Republic of Korea. Tel: +82-2-2019-3370. E-mail: gsjjoon@yuhs.ac

**\*Co-Correspondence to:** Sung Gwe Ahn, MD, PhD

Department of Surgery, Gangnam Severance Hospital, 712 Eonjuro, Gangnam-gu, Seoul, 06273, Republic of Korea. Tel: +82-2-2019-3370. E-mail: [asg2004@yuhs.ac](mailto:asg2004@yuhs.ac)

**Supplementary Table S1. Surgery and adjuvant treatment of patients**

|                            | All patients<br>(%) | Premenopausal<br>patients (%) | Postmenopausal<br>patients (%) | <i>P</i> value |
|----------------------------|---------------------|-------------------------------|--------------------------------|----------------|
| Total                      | 680 (100.0)         | 379 (55.7)                    | 301 (44.3)                     |                |
| Type of Surgery            |                     |                               |                                | .388           |
| Total mastectomy           | 376 (55.3)          | 204 (53.8)                    | 172 (57.1)                     |                |
| Partial<br>mastectomy      | 304 (44.7)          | 175 (46.2)                    | 129 (42.9)                     |                |
| Radiotherapy               |                     |                               |                                | .717           |
| Not administered           | 311 (45.7)          | 171 (45.1)                    | 140 (46.5)                     |                |
| Administered               | 369 (54.3)          | 208 (54.9)                    | 161 (53.5)                     |                |
| Chemotherapy               |                     |                               |                                | .001           |
| Not administered           | 278 (40.9)          | 134 (35.4)                    | 144 (47.8)                     |                |
| Administered               | 402 (59.1)          | 245 (64.6)                    | 157 (52.2)                     |                |
| Endocrine Therapy          |                     |                               |                                | .830           |
| Not complete 5yr           | 57 (8.4)            | 31 (8.2)                      | 26 (8.6)                       |                |
| Complete 5 yr              | 623 (91.6)          | 348 (91.8)                    | 275 (91.4)                     |                |
| SERM                       | 325 (52.2)          | 301 (86.5)                    | 24 (8.7)                       |                |
| AI                         | 260 (41.7)          | 12 (3.4)                      | 248 (90.2)                     |                |
| Switch                     | 38 (6.1)            | 35 (10.1)                     | 3 (1.1)                        |                |
| Trastzumab use in<br>HER2+ |                     |                               |                                | .474           |

|                  |           |           |           |
|------------------|-----------|-----------|-----------|
| Not administered | 53 (67.1) | 29 (70.7) | 24 (63.2) |
| Administered     | 26 (32.9) | 12 (29.3) | 14 (36.8) |

---

SERM, selective estrogen receptor modifier; AI, aromatase inhibitor; HER2, human epidermal growth receptor 2

**Supplementary Table S2. Patients' clinicopathologic feature according to risk groups stratified using CTS5**

|                            | Low risk group<br>(%, <i>N</i> = 424) | Intermediate risk<br>group (%, <i>N</i> = 177) | High risk group<br>(%, <i>N</i> = 79) | <i>P</i> value |
|----------------------------|---------------------------------------|------------------------------------------------|---------------------------------------|----------------|
| Age                        |                                       |                                                |                                       | .110           |
| <50                        | 228 (53.8)                            | 79 (44.6)                                      | 38 (48.1)                             |                |
| ≥50                        | 196 (46.2)                            | 98 (55.4)                                      | 41 (51.9)                             |                |
| Tumour size, mm            |                                       |                                                |                                       | <.001          |
| <10                        | 119 (28.1)                            | 2 (1.1)                                        | 0 (0.0)                               |                |
| 10-20                      | 270 (63.7)                            | 73 (41.2)                                      | 24 (30.4)                             |                |
| >20                        | 35 (8.3)                              | 102 (57.6)                                     | 55 (69.6)                             |                |
| Pathologic nodal<br>status |                                       |                                                |                                       | <.001          |
| None                       | 383 (90.3)                            | 79 (44.6)                                      | 1 (1.3)                               |                |
| 1                          | 35 (8.3)                              | 61 (34.5)                                      | 11 (13.9)                             |                |
| 2-3                        | 6 (1.4)                               | 32 (18.1)                                      | 24 (30.4)                             |                |
| 4-9                        | 0 (0.0)                               | 4 (2.3)                                        | 31 (39.2)                             |                |
| > 9                        | 0 (0.0)                               | 1 (0.6)                                        | 12 (15.2)                             |                |
| Histologic grade           |                                       |                                                |                                       | <.001          |
| Low                        | 211 (49.8)                            | 35 (19.8)                                      | 15 (19.0)                             |                |
| Intermediate               | 187 (44.1)                            | 108 (61.0)                                     | 47 (59.5)                             |                |
| High                       | 26 (6.1)                              | 34 (19.2)                                      | 17 (21.5)                             |                |

|          |            |            |           |       |
|----------|------------|------------|-----------|-------|
| PR       |            |            |           | .822  |
| Negative | 59 (13.9)  | 28 (15.8)  | 12 (15.2) |       |
| Positive | 365 (86.1) | 149 (84.2) | 67 (84.8) |       |
| HER2     |            |            |           | <.001 |
| Negative | 358 (84.3) | 135 (76.3) | 59 (74.7) |       |
| Positive | 31 (7.3)   | 34 (19.2)  | 14 (17.7) |       |
| Unknown  | 35 (8.3)   | 8 (4.5)    | 6 (7.6)   |       |
| Ki-67 LI |            |            |           | .254  |
| ≤20%     | 358 (84.4) | 140 (79.1) | 64 (81.0) |       |
| >20%     | 51 (12.0)  | 33 (18.6)  | 13 (16.5) |       |
| Unknown  | 15 (3.5)   | 4 (2.3)    | 2 (2.5)   |       |

---

CTS5, Clinical Treatment Score post-5 years; PR, progesterone receptor; HER2, human epidermal growth receptor 2; LI, labelling index

Supplementary Table S3. Distribution of organ with late DR

| Organ with late DR | All patients<br>(%, <i>N</i> =680) | Premenopausal<br>patients<br>(%, <i>N</i> =379) | Postmenopausal<br>patients<br>(%, <i>N</i> =301) | <i>P</i> value |
|--------------------|------------------------------------|-------------------------------------------------|--------------------------------------------------|----------------|
| Total              | 35 (100.0)                         | 19 (53.1)                                       | 16 (46.9)                                        | .761           |
| Bone               | 12 (100.0)                         | 6 (50.0)                                        | 6 (50.0)                                         | .687           |
| Lung               | 8 (100.0)                          | 6 (75.0)                                        | 2 (25.0)                                         | .270           |
| Liver              | 3 (100.0)                          | 2 (66.7)                                        | 1 (33.3)                                         | .702           |
| Brain              | 7 (100.0)                          | 2 (28.6)                                        | 5 (71.4)                                         | .146           |
| Lymph node         | 4 (100.0)                          | 2 (50.0)                                        | 2 (50.0)                                         | .817           |
| Other              | 1 (100.0)                          | 1 (100.0)                                       | 0 (0.0)                                          | .372           |

DR, distant recurrence

Supplementary Table S4-1. Multivariable Cox regression analysis of late DR according to continuous valuable of CTS5

|                  | All patients<br>( <i>N</i> = 680) |                   | Premenopausal<br>patients<br>( <i>N</i> = 379) |                   | Postmenopausal<br>patients<br>( <i>N</i> = 301) |                   |
|------------------|-----------------------------------|-------------------|------------------------------------------------|-------------------|-------------------------------------------------|-------------------|
|                  | HR<br>(95% CI)                    | <i>P</i><br>value | HR<br>(95% CI)                                 | <i>P</i><br>value | HR<br>(95% CI)                                  | <i>P</i><br>value |
| PR               |                                   |                   |                                                |                   |                                                 |                   |
| Negative         | Ref.                              |                   | Ref.                                           |                   | Ref.                                            |                   |
| Positive         | 0.62<br>(0.25-1.53)               | .298              | 0.72<br>(0.16-3.20)                            | .663              | 0.56<br>(0.17-1.87)                             | .349              |
| HER2             |                                   |                   |                                                |                   |                                                 |                   |
| Negative         | Ref.                              |                   | Ref.                                           |                   | Ref.                                            |                   |
| Positive         | 0.33<br>(0.08-1.42)               | .136              | 0.34<br>(0.04-2.63)                            | .302              | 0.36<br>(0.04-2.97)                             | .341              |
| Ki-67 LI         |                                   |                   |                                                |                   |                                                 |                   |
| ≤ 20 %           | Ref.                              |                   | Ref.                                           |                   | Ref.                                            |                   |
| > 20%            | 2.37<br>(1.02-5.49)               | .044              | 2.90<br>(1.03-8.26)                            | .045              | 1.53<br>(0.32-7.26)                             | .594              |
| Chemotherapy     |                                   |                   |                                                |                   |                                                 |                   |
| Not administered | Ref.                              |                   | Ref.                                           |                   | Ref.                                            |                   |



|              |             |       |             |      |             |      |
|--------------|-------------|-------|-------------|------|-------------|------|
| Administered | 0.46        | .107  | 0.52        | .420 | 0.38        | .140 |
|              | (0.18-1.18) |       | (0.11-2.56) |      | (0.10-1.38) |      |
| CTS5 score*  | 3.23        | <.001 | 3.70        | .001 | 3.13        | .002 |
|              | (1.95-5.35) |       | (1.66-8.26) |      | (1.53-6.38) |      |

---

\*continuous variable

DR, distant recurrence; CTS5, Clinical Treatment Score post-5 years; HR, hazard ratio; PR, progesterone receptor; HER2, human epidermal growth receptor 2; LI, labelling index

Supplementary Table S4-2. Multivariable Cox regression analysis of late DR according to risk groups stratified using CTS5

|                  | All patients<br>( <i>N</i> = 680) |                   | Premenopausal<br>patients<br>( <i>N</i> = 379) |                   | Postmenopausal<br>patients<br>( <i>N</i> = 301) |                   |
|------------------|-----------------------------------|-------------------|------------------------------------------------|-------------------|-------------------------------------------------|-------------------|
|                  | HR<br>(95% CI)                    | <i>P</i><br>value | HR<br>(95% CI)                                 | <i>P</i><br>value | HR<br>(95% CI)                                  | <i>P</i><br>value |
| PR               |                                   |                   |                                                |                   |                                                 |                   |
| Negative         | Ref.                              |                   | Ref.                                           |                   | Ref.                                            |                   |
| Positive         | 0.57<br>(0.23-1.41)               | .223              | 0.65<br>(0.15-2.90)                            | .570              | 0.53<br>(0.16-1.79)                             | .307              |
| HER2             |                                   |                   |                                                |                   |                                                 |                   |
| Negative         | Ref.                              |                   | Ref.                                           |                   | Ref.                                            |                   |
| Positive         | 0.33<br>(0.08-1.45)               | .143              | 0.41<br>(0.05-3.17)                            | .391              | 0.33<br>(0.04-2.85)                             | .316              |
| Ki-67 LI         |                                   |                   |                                                |                   |                                                 |                   |
| ≤ 20 %           | Ref.                              |                   | Ref.                                           |                   | Ref.                                            |                   |
| > 20%            | 2.41<br>(1.04-5.60)               | .041              | 3.12<br>(1.09-8.89)                            | .034              | 1.66<br>(0.34-8.15)                             | .531              |
| Chemotherapy     |                                   |                   |                                                |                   |                                                 |                   |
| Not administered | Ref.                              |                   | Ref.                                           |                   | Ref.                                            |                   |
| Administered     | 0.67                              | .432              | 1.30                                           | .731              | 0.41                                            | .200              |

|              |              |      |              |      |              |      |
|--------------|--------------|------|--------------|------|--------------|------|
|              | (0.25-1.82)  |      | (0.30-5.63)  |      | (0.11-1.59)  |      |
| CTS5 score   |              |      |              |      |              |      |
| Low          | Ref.         |      | Ref.         |      | Ref.         |      |
| Intermediate | 1.99         | .193 | 1.07         | .934 | 3.33         | .126 |
|              | (0.71-5.60)  |      | (0.24-4.66)  |      | (0.77-14.30) |      |
| High         | 6.04         | .001 | 5.14         | .014 | 7.52         | .017 |
|              | (2.08-17.57) |      | (1.40-18.92) |      | (1.43-39.67) |      |

---

DR, distant recurrence; CTS5, Clinical Treatment Score post-5 years; HR, hazard ratio; PR, progesterone receptor; HER2, human epidermal growth receptor 2; LI, labelling index

Supplementary Table S5. Multivariable analysis of late DR in the intermediate- and high risk CTS5 groups

|                         | Intermediate risk patients<br>( <i>N</i> = 177) |                   | High risk patients<br>( <i>N</i> = 79) |                   |
|-------------------------|-------------------------------------------------|-------------------|----------------------------------------|-------------------|
|                         | HR (95% CI)                                     | <i>P</i><br>value | HR (95% CI)                            | <i>P</i><br>value |
| Age at diagnosis        | 1.04 (0.96-1.12)                                | .386              | 1.01 (0.94-1.09)                       | .784              |
| Tumor size (mm)         |                                                 |                   |                                        |                   |
| <10                     | Ref.                                            |                   | .                                      |                   |
| 10-20                   | NE                                              | NE                | Ref                                    |                   |
| >20                     | NE                                              | NE                | 8.01 (0.37-NE)                         | .185              |
| Pathologic nodal status |                                                 |                   |                                        |                   |
| Negative                | Ref.                                            |                   | Ref.                                   |                   |
| Positive                | 1.99 (0.30-13.05)                               | .474              | NE                                     | NE                |
| Histologic grade        |                                                 |                   |                                        |                   |
| Low/Intermediate        | Ref.                                            |                   | Ref.                                   |                   |
| High                    | 0.80 (0.08-8.43)                                | .852              | 5.74 (1.15-28.70)                      | .033              |
| PR                      |                                                 |                   |                                        |                   |
| Negative                | Ref.                                            |                   | Ref.                                   |                   |
| Positive                | 0.49 (0.09-2.75)                                | .416              | 0.17 (0.04-0.83)                       | .029              |
| HER2                    |                                                 |                   |                                        |                   |

|                  |                   |      |                  |      |
|------------------|-------------------|------|------------------|------|
| Negative         | Ref.              |      | Ref.             |      |
| Positive         | 0.71 (0.08–6.29)  | .754 | 0.43 (0.04–4.41) | .477 |
| Chemotherapy     |                   |      |                  |      |
| Not administered | Ref.              |      | Ref.             |      |
| Administered     | 0.47 (0.07–3.26)  | .442 | 0.13 (0.01–3.10) | .205 |
| Ki-67 LI         |                   |      |                  |      |
| ≤ 20 %           | Ref.              |      | Ref.             |      |
| > 20 %           | 2.10 (0.39–11.18) | .392 | 0.37 (0.03–4.08) | .419 |

---

DR, distant recurrence; CTS5, Clinical Treatment Score post-5 years; HR, hazard ratio; PR, progesterone receptor; HER2, human epidermal growth receptor 2; LI, labelling index; NE, not estimated
